# Supplementary material for: Shiftwork, functional bowel symptoms, and the microbiome
Source: PeerJ. 2021 May 11;9:e11406. doi: 10.7717/peerj.11406 (PMC8121053; doi:10.7717/peerj.11406)
Supplement: Supplemental Information 3 [file peerj-09-11406-s003.xlsx]

## Sheet: Table 1
ShiftworkIBSSymptoms-Request02122021_DATA_LABELS_2021-02-12_1436[1]
Record ID	Gender	Age	When are you normally scheduled to work?	Does the participant have IRS according to the FBD-R3 criteria	Type of IBS according to FBD-R3 criteria
1	Female	22	Nights	No
3	Female	29	Nights	Yes	IBS with diarrhea
4	Female	26	Nights	No
5	Female	23	Nights	Yes	IBS with constipation
6	Female	35	Days	Yes	IBS mixed type
8	Female	50	Days	No
9	Male	29	Nights	No
10	Female	29	Days	No
12	Female	28	Nights	Yes	IBS mixed type
14	Female	48	Days	No
16	Female	25	Days	No
17	Female	26	Days	Yes	IBS mixed type
19	Female	23	Days	Yes	IBS with constipation
20	Female	32	Days	No
21	Female	29	Days	Yes	IBS mixed type
23	Male	28	Days	Yes	IBS mixed type
24	Female	26	Nights	Yes	IBS mixed type
26	Female	28	Days	No
29	Female	55	Nights	Yes	IBS unsubtyped
31	Female	43	Nights	No
32	Female	45	Nights	Yes	IBS mixed type
33	Female	31	Nights	No
35	Female	59	Nights	No
36	Female	45	Nights	No
37	Female	35	Days	No
38	Female	26	Days	No
39	Female	30	Days	No
40	Female	23	Nights	No
44	Female	29	Nights	Yes	IBS mixed type
45	Female	25	Nights	Yes	IBS with diarrhea
46	Female	41	Nights	Yes	IBS mixed type
47	Female	29	Nights	No
48	Female	29	Nights	No
51	Female	25	Nights	No
54	Female	49	Nights	Yes	IBS mixed type
55	Female	29	Days	No
56	Female	52	Nights	No
57	Female	32	Days	No
58	Female	36	Days	No
59	Female	42	Nights	No
60	Female	48	Days	No
61	Female	25	Days	No
62	Female	44	Days
65	Female	30	Days	No
66	Female	22	Nights	Yes	IBS mixed type
67	Female	21	Days	Yes	IBS mixed type
68	Female	22	Rotating shifts	Yes	IBS with diarrhea
69	Female	46	Days	No
71	Female	25	Nights	No
72	Female	24	Nights	No
74	Female	24	Nights	No
1
